# Supplementary material for: Computational Insight into the Nature and Strength of the π-Hole Type Chalcogen∙∙∙Chalcogen Interactions in the XO2∙∙∙CH3YCH3 Complexes (X = S, Se, Te; Y = O, S, Se, Te)
Source: MDPI journal article supplement (doi:10.3390/ijms242216193), 2023-11-10
Supplement: s1 [file s1]

# Computational Insight into the Nature and Strength of the $\pi$ -Hole Type Chalcogen $\cdots$ Chalcogen Interactions in the $\text{XO}_2\cdots\text{CH}_3\text{YCH}_3$ Complexes ( $\text{X} = \text{S}, \text{Se},$ $\text{Te}; \text{Y} = \text{O}, \text{S}, \text{Se}, \text{Te}$ )

Fengying Lei <sup>1</sup>, Qingyu Liu <sup>1</sup>, Yeshuang Zhong <sup>1</sup>, Xinai Cui <sup>1</sup>, Jie Yu <sup>1</sup>, Zuquan Hu <sup>1</sup>, Gang Feng <sup>2</sup>,  
Zhu Zeng <sup>1,\*</sup> and Tao Lu <sup>1,\*</sup>

<sup>1</sup> School of Basic Medical Sciences/School of Biology and Engineering, Guizhou Medical University,  
Guiyang 550025, PR China

<sup>2</sup> School of Chemistry and Chemical Engineering, Chongqing University,  
Daxuecheng South Rd. 55, Chongqing 401331, PR China

**\* Corresponding authors:**

E-mail address: lutao0409@gmc.edu.cn (T. L.); zengzhu@gmc.edu.cn (Z. Z.)

## **Contents:**

### **Supplementary figures**

**Figure S1.** Correlation plots between the binding energy ( $E_B$ ) and the most positive electrostatic potentials ( $V_{S,\max}$ ) on the X atom of the  $\text{XO}_2$  ( $\text{X} = \text{S}, \text{Se}, \text{and Te}$ ).

**Figure S2.** Correlation plots between the binding energy ( $E_B$ ) and the most negative electrostatic potentials ( $V_{S,\min}$ ) on the Y atom of the  $\text{CH}_3\text{YCH}_3$  ( $\text{Y} = \text{O}, \text{S}, \text{Se}, \text{and Te}$ ).

**Figure S3.** Correlation plots between the binding energy ( $E_B$ ) and the  $\text{X}\cdots\text{Y}$  distance between two interacting chalcogen atoms,  $\text{X} = \text{S}, \text{Se}, \text{Te}; \text{Y} = \text{O}, \text{S}, \text{Se}, \text{and Te}$ .

**Figure S4.** Correlation plots between the binding energy ( $E_B$ ) and the total interaction energies ( $E_{\text{total}}$ ) of the studied complexes obtained by the SAPT analysis.

### **Supplementary tables**

**Table S1.** Cartesian coordinates of the  $\text{SO}_2\cdots\text{CH}_3\text{YCH}_3$  ( $\text{Y} = \text{O}, \text{S}, \text{Se}, \text{Te}$ ) complexes in its principal inertial axis system at the MP2/aug-cc-pVTZ(PP) level of theory.

**Table S2.** Cartesian coordinates of the  $\text{SeO}_2\cdots\text{CH}_3\text{YCH}_3$  ( $\text{Y} = \text{O}, \text{S}, \text{Se}, \text{Te}$ ) complexes in its principal inertial axis system at the MP2/aug-cc-pVTZ(PP) level of theory.

**Table S3.** Cartesian coordinates of the  $\text{TeO}_2\cdots\text{CH}_3\text{YCH}_3$  ( $\text{Y} = \text{O}, \text{S}, \text{Se}, \text{Te}$ ) complexes in its principal inertial axis system at the MP2/aug-cc-pVTZ(PP) level of theory.

**Table S4.** The geometrical parameters associated with the  $\text{C-H}\cdots\text{O}$  hydrogen bonds in the twelve studied complexes.

## Supplementary figures

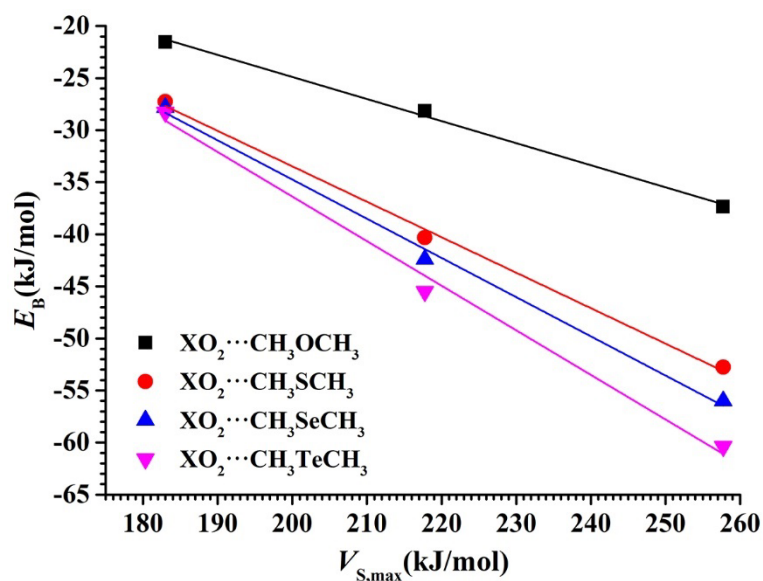

**Figure S1.** Correlation plots between the binding energy ( $E_B$ ) and the most positive electrostatic potentials ( $V_{S,max}$ ) on the X atom of the  $\text{XO}_2$  (X = S, Se, and Te).

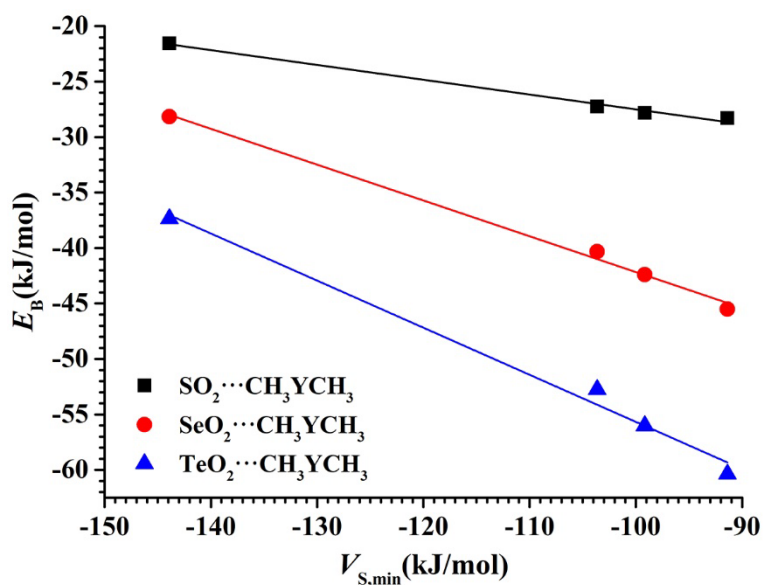

**Figure S2.** Correlation plots between the binding energy ( $E_B$ ) and the most negative electrostatic potentials ( $V_{S,min}$ ) on the Y atom of the  $\text{CH}_3\text{YCH}_3$  (Y = O, S, Se, and Te).

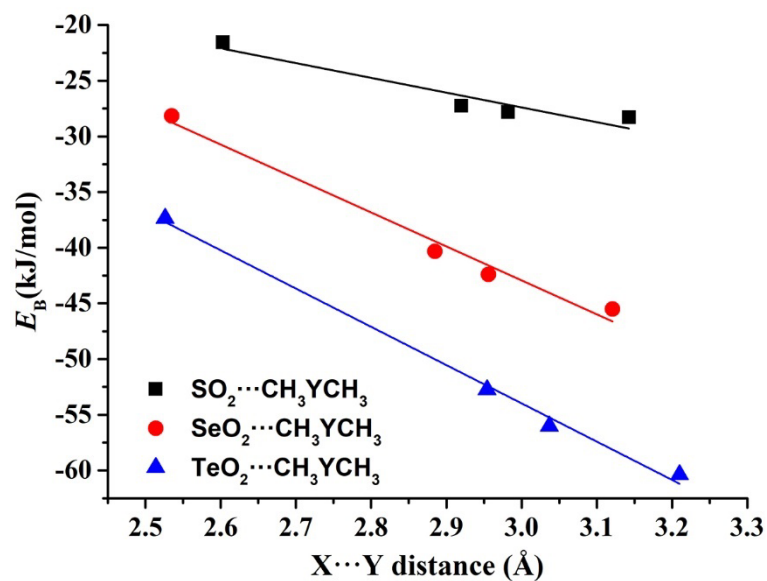

**Figure S3.** Correlation plots between the binding energy ( $E_B$ ) and the X...Y distance between two interacting chalcogen atoms, X = S, Se, Te; Y = O, S, Se, and Te.

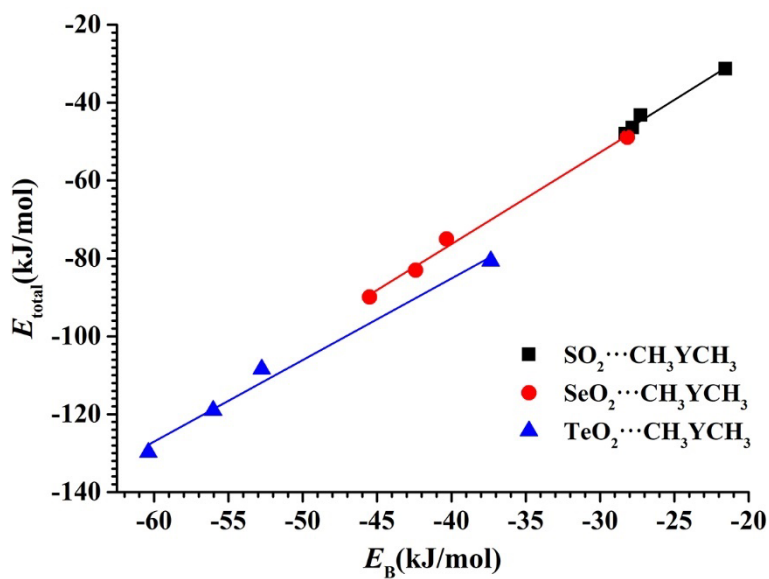

**Figure S4.** Correlation plots between the binding energy ( $E_B$ ) and the total interaction energies ( $E_{\text{total}}$ ) of the studied complexes obtained by the SAPT analysis.

## Supplementary tables

**Table S1.** Cartesian coordinates of the  $\text{SO}_2\cdots\text{CH}_3\text{YCH}_3$  ( $\text{Y} = \text{O}, \text{S}, \text{Se}, \text{Te}$ ) complexes in its principal inertial axis system at the MP2/aug-cc-pVTZ(PP) level of theory.

| $\text{SO}_2\cdots\text{CH}_3\text{OCH}_3$ |           |           |           | $\text{SO}_2\cdots\text{CH}_3\text{SeCH}_3$ |           |           |           |
|--------------------------------------------|-----------|-----------|-----------|---------------------------------------------|-----------|-----------|-----------|
| Atom                                       | $a$ (Å)   | $b$ (Å)   | $c$ (Å)   | Atom                                        | $a$ (Å)   | $b$ (Å)   | $c$ (Å)   |
| S                                          | -1.270245 | -0.246643 | -0.338087 | S                                           | -1.807245 | -0.000079 | -0.402139 |
| O                                          | -1.067288 | -1.113844 | 0.827027  | O                                           | -1.930383 | -1.251497 | 0.364791  |
| O                                          | -1.599689 | 1.157858  | -0.085741 | O                                           | -1.930481 | 1.251366  | 0.364725  |
| O                                          | 1.282686  | 0.223707  | -0.526221 | C                                           | 1.107937  | -1.440057 | 0.823153  |
| C                                          | 1.948593  | -0.984857 | -0.186051 | H                                           | 1.261668  | -2.365832 | 0.275180  |
| H                                          | 1.773170  | -1.688276 | -0.995383 | H                                           | 1.905155  | -1.303259 | 1.548888  |
| H                                          | 3.021839  | -0.809746 | -0.080314 | H                                           | 0.130985  | -1.458036 | 1.304295  |
| H                                          | 1.552531  | -1.394551 | 0.747172  | C                                           | 1.107493  | 1.439687  | 0.823542  |
| C                                          | 1.470289  | 1.204503  | 0.486085  | H                                           | 1.904673  | 1.302913  | 1.549330  |
| H                                          | 2.531980  | 1.439040  | 0.591257  | H                                           | 1.261045  | 2.365737  | 0.275970  |
| H                                          | 0.923552  | 2.091761  | 0.180944  | H                                           | 0.130523  | 1.457382  | 1.304662  |
| H                                          | 1.081885  | 0.848424  | 1.444999  | Se                                          | 1.174006  | 0.000165  | -0.457071 |
| $\text{SO}_2\cdots\text{CH}_3\text{SCH}_3$ |           |           |           | $\text{SO}_2\cdots\text{CH}_3\text{TeCH}_3$ |           |           |           |
| Atom                                       | $a$ (Å)   | $b$ (Å)   | $c$ (Å)   | Atom                                        | $a$ (Å)   | $b$ (Å)   | $c$ (Å)   |
| S                                          | -1.519461 | -0.000876 | -0.376519 | S                                           | -2.072248 | 0.001722  | -0.450824 |
| O                                          | -1.567798 | -1.251504 | 0.396506  | O                                           | -2.246667 | -1.251965 | 0.307779  |
| O                                          | -1.568576 | 1.251454  | 0.393629  | O                                           | -2.242055 | 1.253900  | 0.311405  |
| C                                          | 1.505319  | -1.369937 | 0.499770  | C                                           | 0.760321  | -1.555364 | 1.058818  |
| H                                          | 1.521828  | -2.287681 | -0.083207 | H                                           | 1.078729  | -2.484812 | 0.594294  |
| H                                          | 2.426573  | -1.284124 | 1.072331  | H                                           | 1.368000  | -1.351309 | 1.935868  |
| H                                          | 0.638595  | -1.382036 | 1.160926  | H                                           | -0.299427 | -1.603264 | 1.305831  |
| C                                          | 1.502703  | 1.370064  | 0.502152  | C                                           | 0.766827  | 1.557263  | 1.054098  |
| H                                          | 2.423624  | 1.284145  | 1.075300  | H                                           | 1.377365  | 1.356200  | 1.929843  |
| H                                          | 1.519046  | 2.288766  | -0.079280 | H                                           | 1.083875  | 2.485049  | 0.585309  |
| H                                          | 0.635602  | 1.380201  | 1.162861  | H                                           | -0.292059 | 1.606520  | 1.304661  |
| S                                          | 1.386810  | 0.000900  | -0.663578 | Te                                          | 1.068969  | -0.001208 | -0.347569 |

**Table S2.** Cartesian coordinates of the  $\text{SeO}_2\cdots\text{CH}_3\text{YCH}_3$  ( $\text{Y} = \text{O}, \text{S}, \text{Se}, \text{Te}$ ) complexes in its principal inertial axis system at the MP2/aug-cc-pVTZ(PP) level of theory.

| $\text{SeO}_2\cdots\text{CH}_3\text{OCH}_3$ |           |           |           | $\text{SeO}_2\cdots\text{CH}_3\text{SeCH}_3$ |           |           |           |
|---------------------------------------------|-----------|-----------|-----------|----------------------------------------------|-----------|-----------|-----------|
| Atom                                        | $a$ (Å)   | $b$ (Å)   | $c$ (Å)   | Atom                                         | $a$ (Å)   | $b$ (Å)   | $c$ (Å)   |
| O                                           | -1.528328 | -0.229060 | -0.525227 | O                                            | -1.566012 | -1.349880 | 0.610474  |
| C                                           | -1.777153 | -1.217891 | 0.474410  | O                                            | -1.566153 | 1.349641  | 0.611046  |
| H                                           | -1.217730 | -2.105060 | 0.194399  | C                                            | 1.440638  | -1.447737 | 0.812541  |
| H                                           | -1.438070 | -0.864598 | 1.451730  | H                                            | 1.679667  | -2.356351 | 0.266795  |
| H                                           | -2.844977 | -1.438839 | 0.511336  | H                                            | 2.198345  | -1.255702 | 1.567280  |
| C                                           | -2.179089 | 0.996736  | -0.196819 | H                                            | 0.442116  | -1.527264 | 1.247720  |
| H                                           | -1.796320 | 1.390782  | 0.747650  | C                                            | 1.440865  | 1.448065  | 0.811922  |
| H                                           | -1.967533 | 1.697295  | -1.000009 | H                                            | 2.198957  | 1.256602  | 1.566418  |
| H                                           | -3.256070 | 0.835991  | -0.124386 | H                                            | 1.679526  | 2.356468  | 0.265643  |
| O                                           | 1.273819  | -1.375702 | 0.083362  | H                                            | 0.442493  | 1.527647  | 1.247437  |
| O                                           | 0.712459  | 1.076418  | 1.077037  | Se                                           | 1.463200  | -0.000118 | -0.456918 |
| Se                                          | 0.958663  | 0.177591  | -0.250813 | Se                                           | -1.488871 | 0.000075  | -0.298383 |

  

| $\text{SeO}_2\cdots\text{CH}_3\text{SCH}_3$ |           |           |           | $\text{SeO}_2\cdots\text{CH}_3\text{TeCH}_3$ |           |           |           |
|---------------------------------------------|-----------|-----------|-----------|----------------------------------------------|-----------|-----------|-----------|
| Atom                                        | $a$ (Å)   | $b$ (Å)   | $c$ (Å)   | Atom                                         | $a$ (Å)   | $b$ (Å)   | $c$ (Å)   |
| O                                           | -1.189134 | -1.349388 | 0.629701  | O                                            | -1.888219 | -1.352177 | 0.575435  |
| O                                           | -1.191472 | 1.349089  | 0.628893  | O                                            | -1.886867 | 1.352363  | 0.576351  |
| C                                           | 1.820542  | -1.376398 | 0.487951  | C                                            | 1.103009  | -1.561326 | 1.051973  |
| H                                           | 1.897234  | -2.283226 | -0.106955 | H                                            | 1.485914  | -2.472820 | 0.601296  |
| H                                           | 2.723457  | -1.246934 | 1.080463  | H                                            | 1.675142  | -1.313171 | 1.941599  |
| H                                           | 0.933106  | -1.436546 | 1.121560  | H                                            | 0.034944  | -1.656504 | 1.265015  |
| C                                           | 1.818600  | 1.376877  | 0.488731  | C                                            | 1.104802  | 1.561938  | 1.050674  |
| H                                           | 2.721985  | 1.248786  | 1.080868  | H                                            | 1.677964  | 1.314665  | 1.939874  |
| H                                           | 1.893544  | 2.284436  | -0.105311 | H                                            | 1.486970  | 2.473047  | 0.598607  |
| H                                           | 0.931507  | 1.435189  | 1.123020  | H                                            | 0.036953  | 1.657154  | 1.264856  |
| S                                           | 1.666612  | 0.000811  | -0.661314 | Te                                           | 1.356631  | -0.000360 | -0.350369 |
| Se                                          | -1.192842 | -0.000446 | -0.280631 | Se                                           | -1.764379 | 0.000329  | -0.330066 |

**Table S3.** Cartesian coordinates of the  $\text{TeO}_2\cdots\text{CH}_3\text{YCH}_3$  ( $\text{Y} = \text{O}, \text{S}, \text{Se}, \text{Te}$ ) complexes in its principal inertial axis system at the MP2/aug-cc-pVTZ(PP) level of theory.

| $\text{TeO}_2\cdots\text{CH}_3\text{OCH}_3$ |           |           |           | $\text{TeO}_2\cdots\text{CH}_3\text{SeCH}_3$ |           |           |           |
|---------------------------------------------|-----------|-----------|-----------|----------------------------------------------|-----------|-----------|-----------|
| Atom                                        | $a$ (Å)   | $b$ (Å)   | $c$ (Å)   | Atom                                         | $a$ (Å)   | $b$ (Å)   | $c$ (Å)   |
| O                                           | 1.046928  | 1.597510  | 0.213041  | O                                            | -1.283903 | -1.479685 | 0.811078  |
| O                                           | 0.440475  | -1.109449 | 1.284345  | O                                            | -1.283952 | 1.479730  | 0.810984  |
| O                                           | -1.678355 | 0.227155  | -0.515939 | C                                            | 1.734449  | -1.457556 | 0.793988  |
| C                                           | -2.022113 | 1.225540  | 0.457527  | H                                            | 2.018929  | -2.348565 | 0.241032  |
| H                                           | -1.404222 | 2.094739  | 0.253682  | H                                            | 2.479765  | -1.232938 | 1.551969  |
| H                                           | -3.079526 | 1.467487  | 0.354083  | H                                            | 0.733631  | -1.582480 | 1.219831  |
| H                                           | -1.813169 | 0.855050  | 1.463021  | C                                            | 1.734435  | 1.457516  | 0.794079  |
| C                                           | -2.354418 | -1.005996 | -0.241373 | H                                            | 2.479920  | 1.232973  | 1.551915  |
| H                                           | -3.430940 | -0.835428 | -0.251227 | H                                            | 2.018676  | 2.348606  | 0.241127  |
| H                                           | -2.085585 | -1.700493 | -1.032888 | H                                            | 0.733669  | 1.582259  | 1.220096  |
| H                                           | -2.037055 | -1.401921 | 0.725140  | Se                                           | 1.706653  | 0.000019  | -0.466604 |
| Te                                          | 0.800717  | -0.144585 | -0.205006 | Te                                           | -1.322332 | -0.000012 | -0.243583 |

  

| $\text{TeO}_2\cdots\text{CH}_3\text{SCH}_3$ |           |           |           | $\text{TeO}_2\cdots\text{CH}_3\text{TeCH}_3$ |           |           |           |
|---------------------------------------------|-----------|-----------|-----------|----------------------------------------------|-----------|-----------|-----------|
| Atom                                        | $a$ (Å)   | $b$ (Å)   | $c$ (Å)   | Atom                                         | $a$ (Å)   | $b$ (Å)   | $c$ (Å)   |
| O                                           | -0.907896 | -1.478334 | 0.818276  | O                                            | -1.606008 | -1.482467 | 0.789439  |
| O                                           | -0.908089 | 1.478359  | 0.818127  | O                                            | -1.605957 | 1.482441  | 0.789520  |
| C                                           | 2.090255  | -1.385378 | 0.463517  | C                                            | 1.414055  | -1.569509 | 1.041639  |
| H                                           | 2.208002  | -2.278814 | -0.144807 | H                                            | 1.825965  | -2.466023 | 0.586403  |
| H                                           | 2.986563  | -1.221549 | 1.057202  | H                                            | 1.985574  | -1.297428 | 1.924712  |
| H                                           | 1.199598  | -1.489777 | 1.090146  | H                                            | 0.347389  | -1.697181 | 1.261349  |
| C                                           | 2.089987  | 1.385470  | 0.463611  | C                                            | 1.414147  | 1.569577  | 1.041525  |
| H                                           | 2.986942  | 1.222302  | 1.056501  | H                                            | 1.985964  | 1.297716  | 1.924472  |
| H                                           | 2.206457  | 2.279110  | -0.144662 | H                                            | 1.825755  | 2.466119  | 0.586068  |
| H                                           | 1.199797  | 1.489088  | 1.091014  | H                                            | 0.347517  | 1.697078  | 1.261500  |
| S                                           | 1.890149  | 0.000066  | -0.671531 | Te                                           | 1.608341  | -0.000024 | -0.361657 |
| Te                                          | -1.030448 | -0.000042 | -0.229132 | Te                                           | -1.600489 | 0.000015  | -0.266712 |

**Table S4.** The geometrical parameters associated with the C–H···O hydrogen bonds in the twelve studied complexes.

| Complexes                                    | $d_{\text{O}\cdots\text{H}}$ (Å) | $\angle\text{C-H}\cdots\text{O}$ (°) |
|----------------------------------------------|----------------------------------|--------------------------------------|
| $\text{SO}_2\cdots\text{CH}_3\text{OCH}_3$   | 2.704/2.636                      | 102.4/110.2                          |
| $\text{SO}_2\cdots\text{CH}_3\text{SCH}_3$   | <b>2.338</b> <sup>a</sup>        | <b>123.4</b>                         |
| $\text{SO}_2\cdots\text{CH}_3\text{SeCH}_3$  | <b>2.275</b>                     | <b>129.0</b>                         |
| $\text{SO}_2\cdots\text{CH}_3\text{TeCH}_3$  | <b>2.217</b>                     | <b>138.2</b>                         |
| $\text{SeO}_2\cdots\text{CH}_3\text{OCH}_3$  | 2.598/2.550                      | 106.0/114.3                          |
| $\text{SeO}_2\cdots\text{CH}_3\text{SCH}_3$  | <b>2.181</b>                     | <b>131.1</b>                         |
| $\text{SeO}_2\cdots\text{CH}_3\text{SeCH}_3$ | <b>2.115</b>                     | <b>137.9</b>                         |
| $\text{SeO}_2\cdots\text{CH}_3\text{TeCH}_3$ | <b>2.066</b>                     | <b>146.2</b>                         |
| $\text{TeO}_2\cdots\text{CH}_3\text{OCH}_3$  | 2.501/2.555                      | 113.7/115.8                          |
| $\text{TeO}_2\cdots\text{CH}_3\text{SCH}_3$  | <b>2.126</b>                     | <b>137.1</b>                         |
| $\text{TeO}_2\cdots\text{CH}_3\text{SeCH}_3$ | <b>2.061</b>                     | <b>144.3</b>                         |
| $\text{TeO}_2\cdots\text{CH}_3\text{TeCH}_3$ | <b>2.021</b>                     | <b>151.8</b>                         |

<sup>a</sup> Both the bond length and bond angle of two C–H···O hydrogen bonds in these complexes are identical due to they have the  $C_s$  symmetry.
